# Supplementary figures and images for: Dual enhancement in strength and ductility of Fe-rich medium-entropy alloys via an in situ formed heterogeneous multi-phase structure
Source: Royal Society of Chemistry journal article supplement (doi:10.1039/d4nr02369b), 2024-01-01

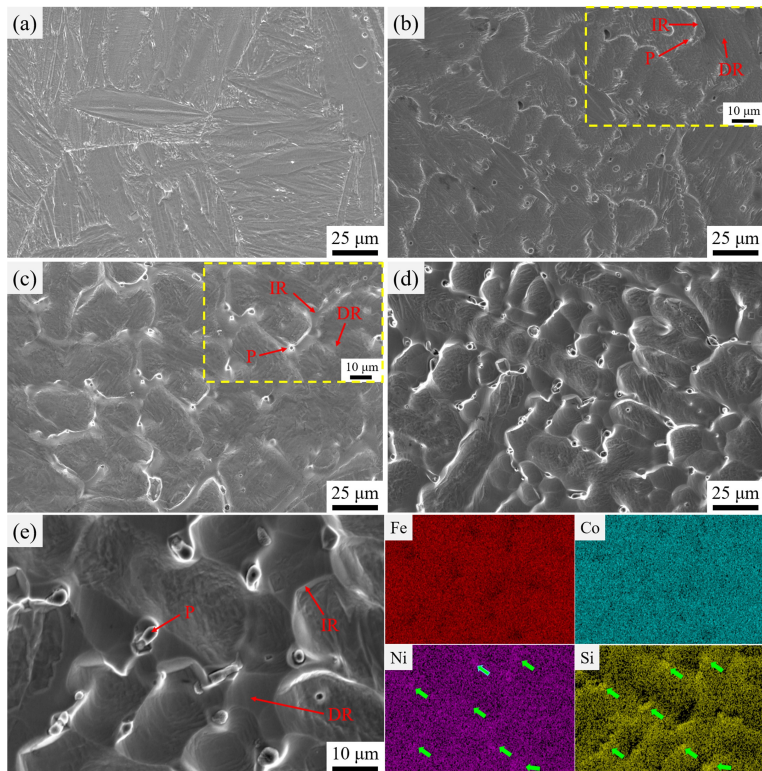

Supplement: d4nr02369b2.pdf [file d4nr02369b2.pdf]

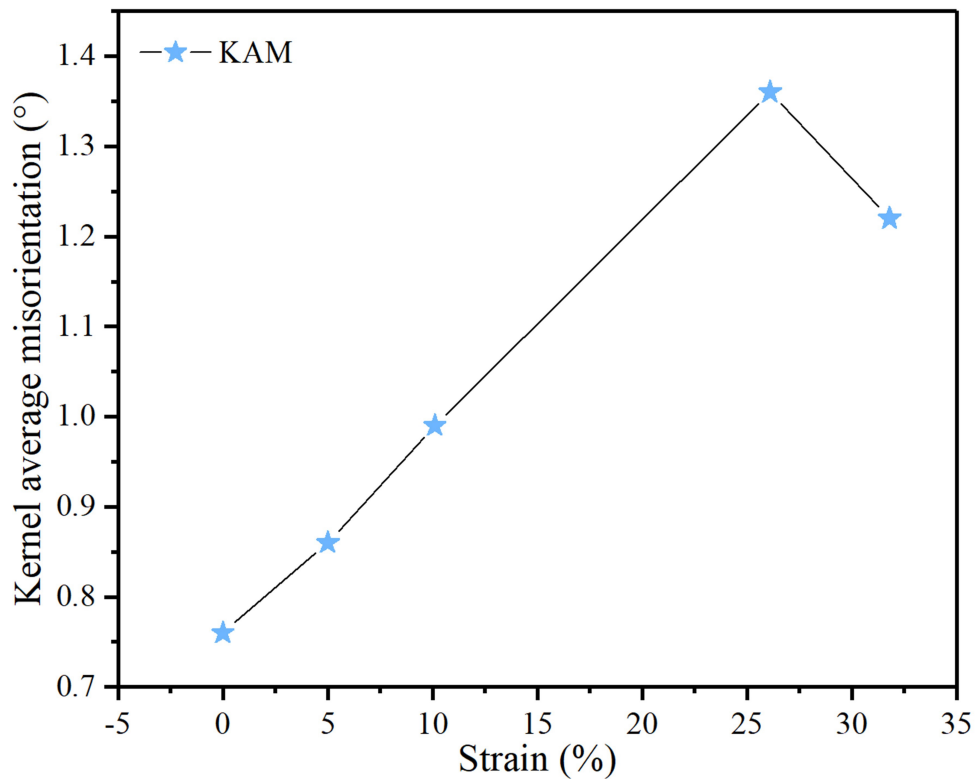

Supplement: d4nr02369b3.pdf [file d4nr02369b3.pdf]
